# Supplementary material for: Intention to seek emergency medical services during community overdose events in British Columbia, Canada: A cross-sectional survey
Source: Research Square preprint supplement (doi:10.21203/rs.3.rs-1328199/v1), 2022-02-08
Supplement: Supplementary file [file 676d4d180b035d2558deda94.pdf]

## Additional File 2

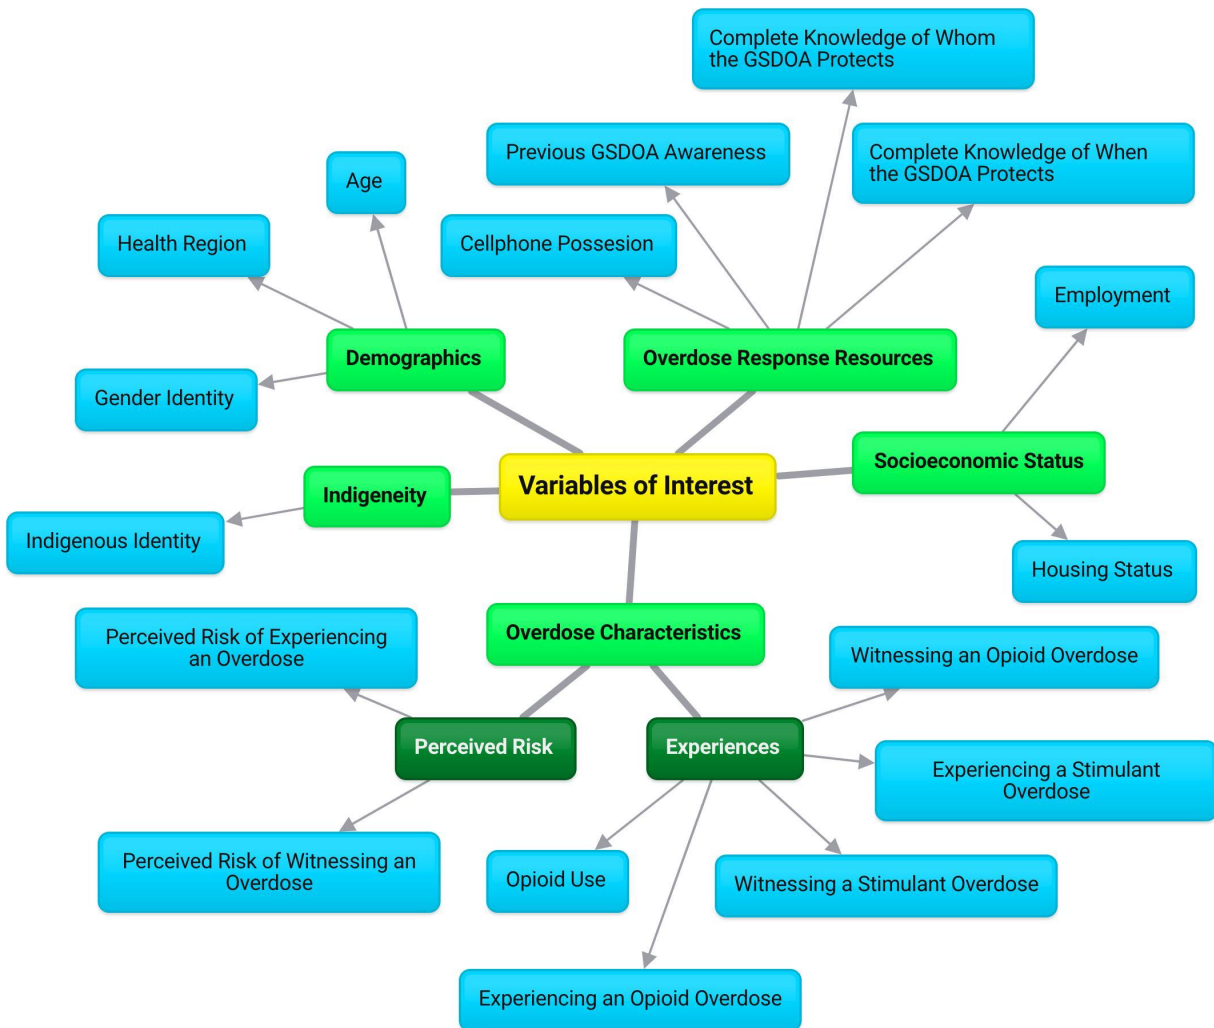

**Supplementary Figure 1.** Concept map of study variables of interest used to inform the development of a hierarchical regression model. Variables (blue) were assembled into categories (green) and subcategories (dark green) with categories ultimately becoming the “blocks” upon which the regression was built.

**Supplementary Table 1.** Adjusted odds ratios (AOR) for predictors of intention to call 9-1-1 with multiple imputations by chained equation (MICE).

|                                        | <b>Calling 911 at an OD event</b>                         |                                                                   |
|----------------------------------------|-----------------------------------------------------------|-------------------------------------------------------------------|
|                                        | Block 5 (OD Characteristics) <sup>a</sup><br>AOR (95% CI) | Imputed Block 5 (OD Characteristics) <sup>b</sup><br>AOR (95% CI) |
| <b>Demographic Characteristics</b>     |                                                           |                                                                   |
| <i>Age (years)</i>                     |                                                           |                                                                   |
| 16 – 24                                | —                                                         | —                                                                 |
| 25 – 34                                | 0.20 (0.04, 0.98) *                                       | 0.24 (0.08, 0.76) *                                               |
| 35 – 44                                | 0.24 (0.05, 1.18)                                         | 0.33 (0.11, 1.06)                                                 |
| 45 – 54                                | 0.55 (0.10, 3.07)                                         | 0.78 (0.20, 3.03)                                                 |
| 55 +                                   | 0.17 (0.03, 0.90) *                                       | 0.40 (0.12, 1.36)                                                 |
| <i>Gender</i>                          |                                                           |                                                                   |
| Cis man                                | —                                                         | —                                                                 |
| Cis woman                              | 3.37 (1.19, 9.50) *                                       | 1.64 (0.76, 3.54)                                                 |
| <i>Indigenous Identity<sup>c</sup></i> |                                                           |                                                                   |
| Non-indigenous                         | —                                                         | —                                                                 |
| Indigenous                             | 0.64 (0.25, 1.64)                                         | 0.84 (0.40, 1.80)                                                 |
| <b>SES Factors</b>                     |                                                           |                                                                   |
| <i>Housing Status</i>                  |                                                           |                                                                   |
| Private - Alone                        | —                                                         | —                                                                 |
| Private - With others                  | 4.96 (1.21, 20.29) *                                      | 4.76 (1.69, 13.44) **                                             |
| Supportive/Unstable Housing            | 3.96 (1.31, 11.98) *                                      | 5.20 (2.29, 11.78) ***                                            |
| Homeless                               | 2.39 (0.58, 9.82)                                         | 3.42 (1.15, 10.16) *                                              |
| <i>Employment Status</i>               |                                                           |                                                                   |
| Not employed                           | —                                                         | —                                                                 |
| Employed                               | 0.46 (0.18, 1.18)                                         | 0.44 (0.21, 0.91) *                                               |
| <b>Overdose Response Resources</b>     |                                                           |                                                                   |
| <i>Previous awareness of GSDOA</i>     |                                                           |                                                                   |
| Unaware                                | —                                                         | —                                                                 |
| Aware                                  | 4.16 (1.62, 10.67) **                                     | 2.28 (1.08, 4.79) *                                               |
| <b>Overdose Characteristics</b>        |                                                           |                                                                   |
| <i>Stimulant OD</i>                    |                                                           |                                                                   |
| No                                     | —                                                         | —                                                                 |
| Yes                                    | 0.24 (0.09, 0.65) **                                      | 0.46 (0.19, 1.13)                                                 |

Note: \*p<0.05, \*\*p<0.01, \*\*\*p<0.001.

<sup>a</sup> Final unimputed model is based on N = 327 observations after exclusion of “unknown” responses for each variable.

<sup>b</sup> Final imputed model is based on N = 493 observations after “unknown” responses were imputed via MICE (54).

<sup>d</sup> The authors recognize that Indigenous identity is often a proxy for factors like intergenerational trauma, systemic racism, and socioeconomic status.

<sup>d</sup> “Never” = “Never”; “Ever” = “Rarely/sometimes/often/all the time”
